# Supplementary material for: Exploring immunoregulatory properties of a phenolic-enriched maple syrup extract through integrated proteomics and in vitro assays
Source: Royal Society of Chemistry journal article supplement (doi:10.1039/d3fo04026g), 2023-11-21
Supplement: d3fo04026g4.pdf [file d3fo04026g4.pdf]

**Supplement Material for**

**Exploring immunoregulatory properties of a phenolic-enriched maple syrup extract**

**through integrated proteomics and in vitro assays**

Tess Puopolo<sup>a</sup>, Ying Chen<sup>a,b</sup>, Hang Ma<sup>a</sup>, Chang Liu<sup>a\*</sup> and Navindra P. Seeram<sup>a\*</sup>

<sup>a</sup>Department of Biomedical and Pharmaceutical Sciences, College of Pharmacy, University of Rhode Island, Kingston, RI 02881, USA

<sup>b</sup>Department of Obstetrics and Gynecology, The Second Affiliated Hospital of Soochow University, Suzhou, 215004, China

\*Co-corresponding authors

Chang Liu ([hichang813@uri.edu](mailto:hichang813@uri.edu))

Navindra P. Seeram ([nseeram@uri.edu](mailto:nseeram@uri.edu))

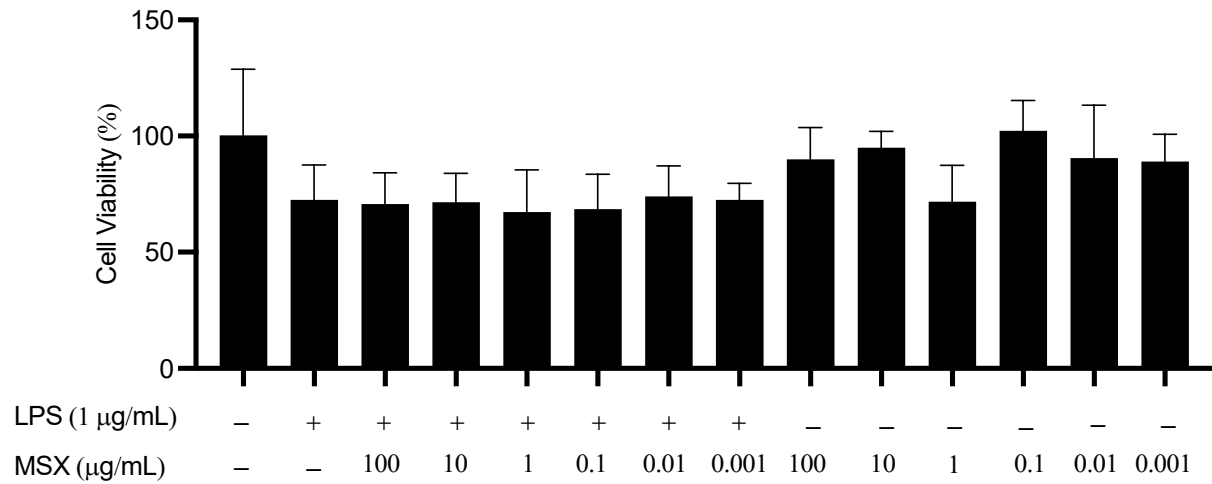

Figure S1. THP-1 cell viability determined by the MTT assay. Differentiated THP-1 monocytes were treated with LPS (1 µg/mL), MSX (0.001, 0.01, 0.1, 1, 10 and 100 µg/mL) + LPS (100 µg/mL) or MSX (0.001, 0.01, 0.1, 1, 10 and 100 µg/mL) alone.

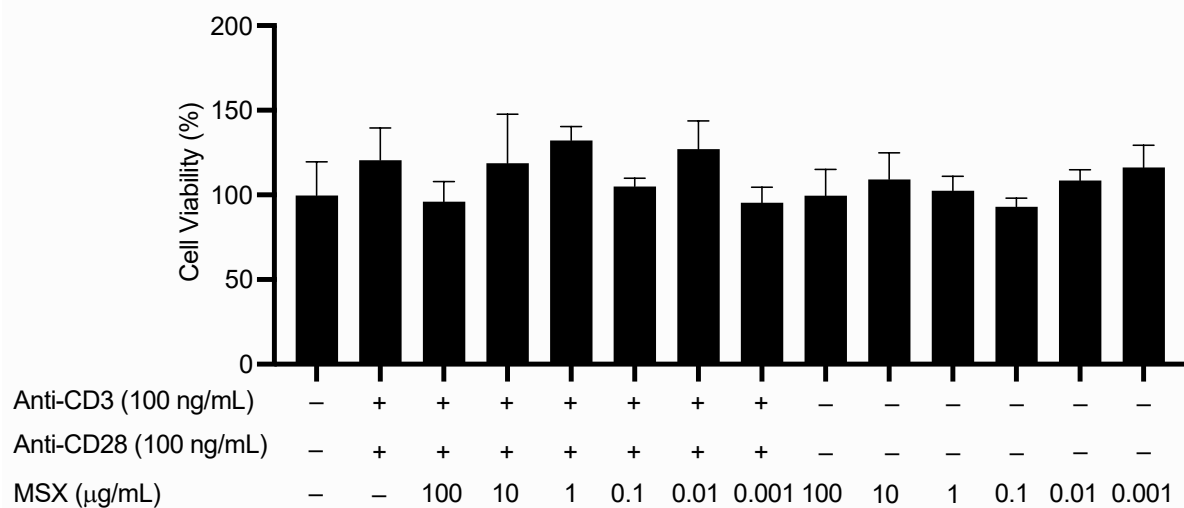

Figure S2. Jurkat T cell cell viability as determined by the CCK-8 assay. Jurkat cells were treated with anti-CD3 (100 ng/mL)/ anti-CD28 (100 ng/mL), MSX (0.001, 0.01, 0.1, 1, 10, and 100 µg/mL) + anti CD3 (100 ng/mL)/ anti-CD28 (100 ng/mL), or MSX (0.001, 0.01, 0.1, 1, 10, and 100 µg/mL) alone.

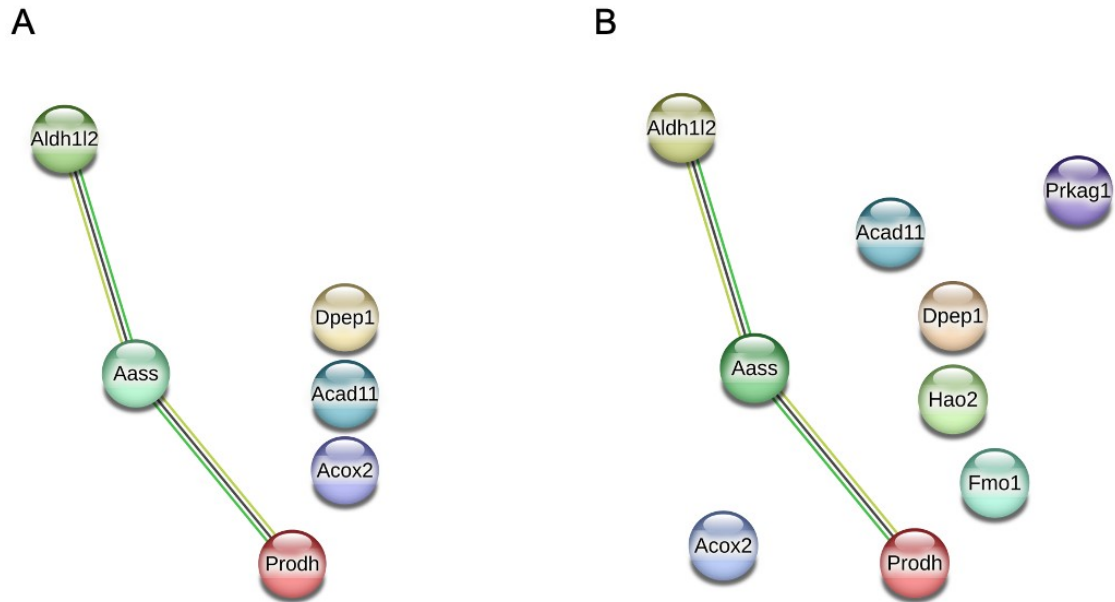

Figure S3. STRING analysis gene ontology biological process clusters for proteins uniquely expressed in the LPS treatment group. (A) Six proteins associated with carboxylic acid catabolic process. (B) Nine proteins associated with organic acid metabolic process.
